# Supplementary material
Source: PubMed Central journal article supplement (PMC5644510)
Supplement: NIHMS907770-supplement.pdf [file NIHMS907770-supplement.pdf]

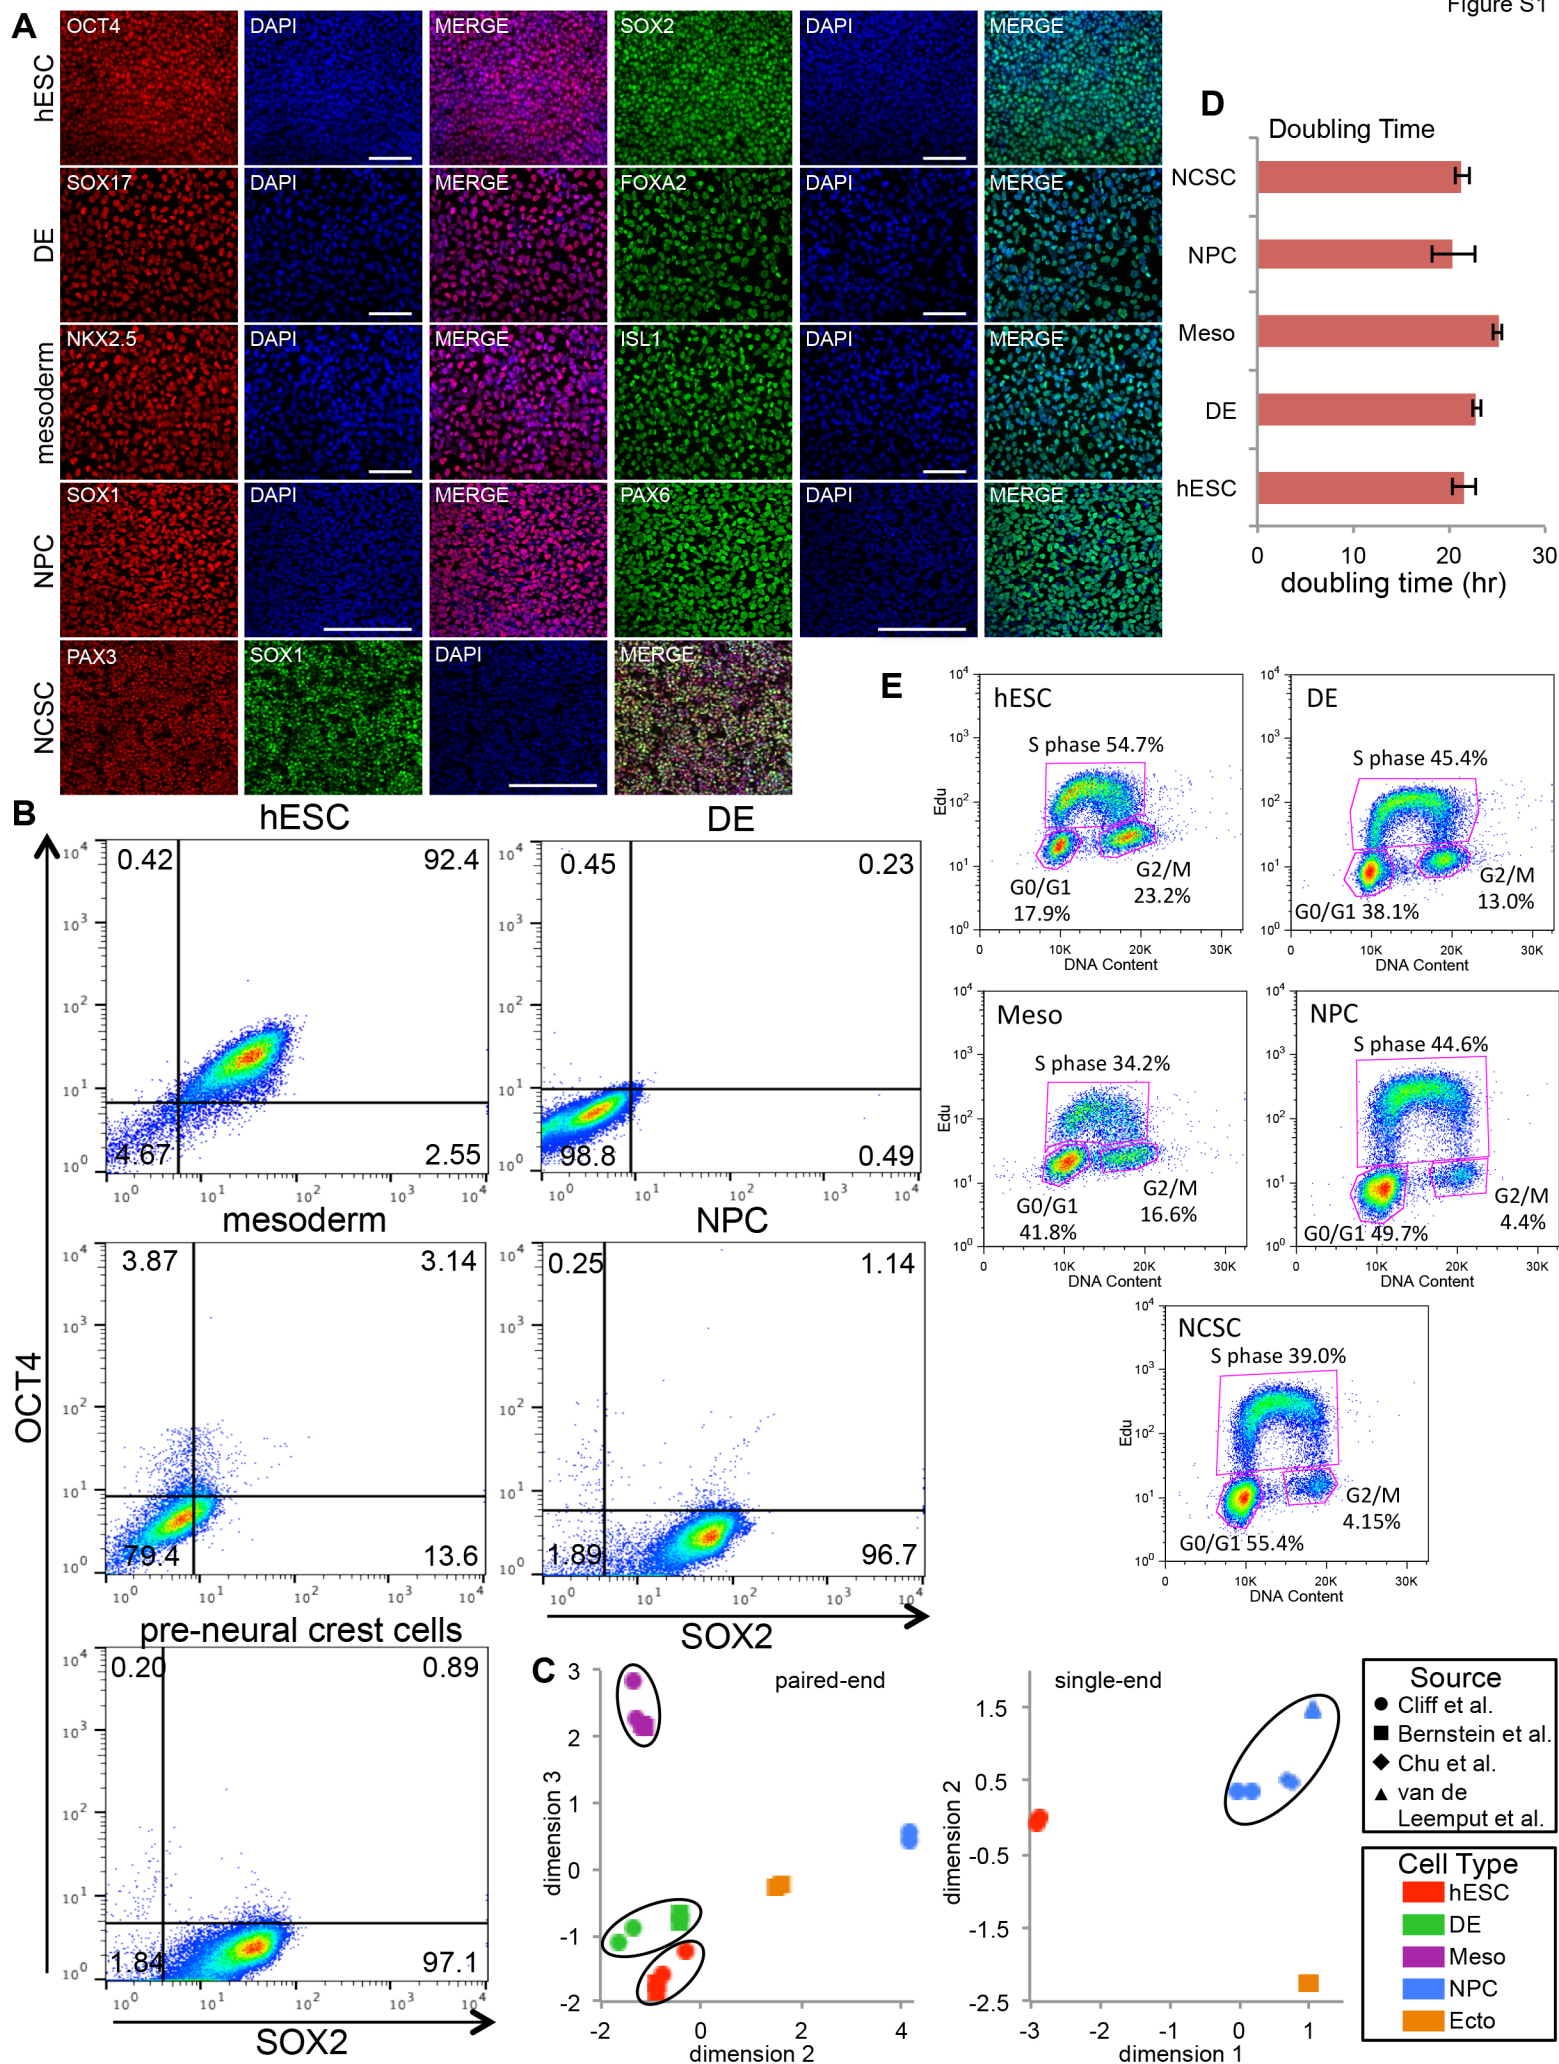

**Figure S1. Related to Figure 1. (A)** Immunofluorescence staining for markers of hESCs (OCT4, SOX2), definitive endoderm (DE) (SOX17, FOXA2), mesoderm (HNF4a, ISL1), neural progenitor cells (NPC) (SOX1, PAX6) and pre-neural crest cells (NCSC) (PAX3, SOX1). Micron bars, 100  $\mu$ m. **(B)** Flow cytometry analysis of hESCs, DE, mesoderm, NPC and NCSC. Cells were probed with antibodies for OCT4 and SOX2. The percentage of positive cells is indicated in each quadrant. **(C)** Multidimensional scaling analysis of transcript levels measured by RNA-seq of cell types from this study and three equivalent, publicly available data sets. Analysis was performed on either paired-end or single-end data sets as indicated. Shapes indicate cell source and color indicates cell type. Cell types that cluster based on identity are enclosed in a black oval shape. **(D)** Doubling time calculations in hours (hr) for hESCs, DE, mesoderm (Meso), NPC and NCSC. Cells were plated and cultured under normal growth conditions and collected after 2, 3 and 4 days, for hESCs, DE and Meso, or after 4, 5 and 6 days, for NPC and NSCS. Each time point was repeated in triplicate and each replicate was counted 4 times (n=36). Error bars represent the standard deviation. **(E)** Percentage of cells in the indicated cell cycle phase for hESCs, DE, Meso, NPC and NCSC. The X-axis indicates DNA content of the cell through FxCycle dye staining and the Y-axis represents incorporation of the nucleotide analog EdU after a brief pulse period (indicative of S-phase cells).





**Figure S2. Related to Figure 2. (A)** Total  $^{13}\text{C}$ -carbon flux through glycolytic intermediates, lactate, alanine, acetyl-CoA and acetate over 4 hr in the indicated cell types. Units are nmol/hr standardized to 25 million cells with arrow color corresponding to bar color in the plot for each reaction. Error (+/-) represents the standard deviation. All experiments were performed in biological triplicate. **(B)** qRT-PCR heat map showing relative transcript levels for MYC, NMYC and representative metabolic 'switch' transcripts (*HK1* through to *TALDO1*). Samples were analyzed at different stages of neural progenitor cell differentiation: pre-neural progenitor cells (pre-NPC) d2-5, neural progenitor cells d6-8, floor plate precursor cells d9-14. **(C)** qRT-PCR analysis of hESCs and NPC differentiation samples as in (B). Levels of *PAX6* and floor plate neuron precursor (*FOXA2*, *LMXA1*) transcripts are shown. **(D)**  $^{13}\text{C}$ -glucose metabolic flux analysis where metabolite levels after 4 hr of labeling of hESCs and NPC differentiation samples as in (B). All experiments were performed in biological triplicate. Error bars represent the standard deviation. \*\*\*\*  $p < 0.0001$ , \*\*\*  $p < 0.001$ , \*\*  $p < 0.01$  for one-way ANOVA.

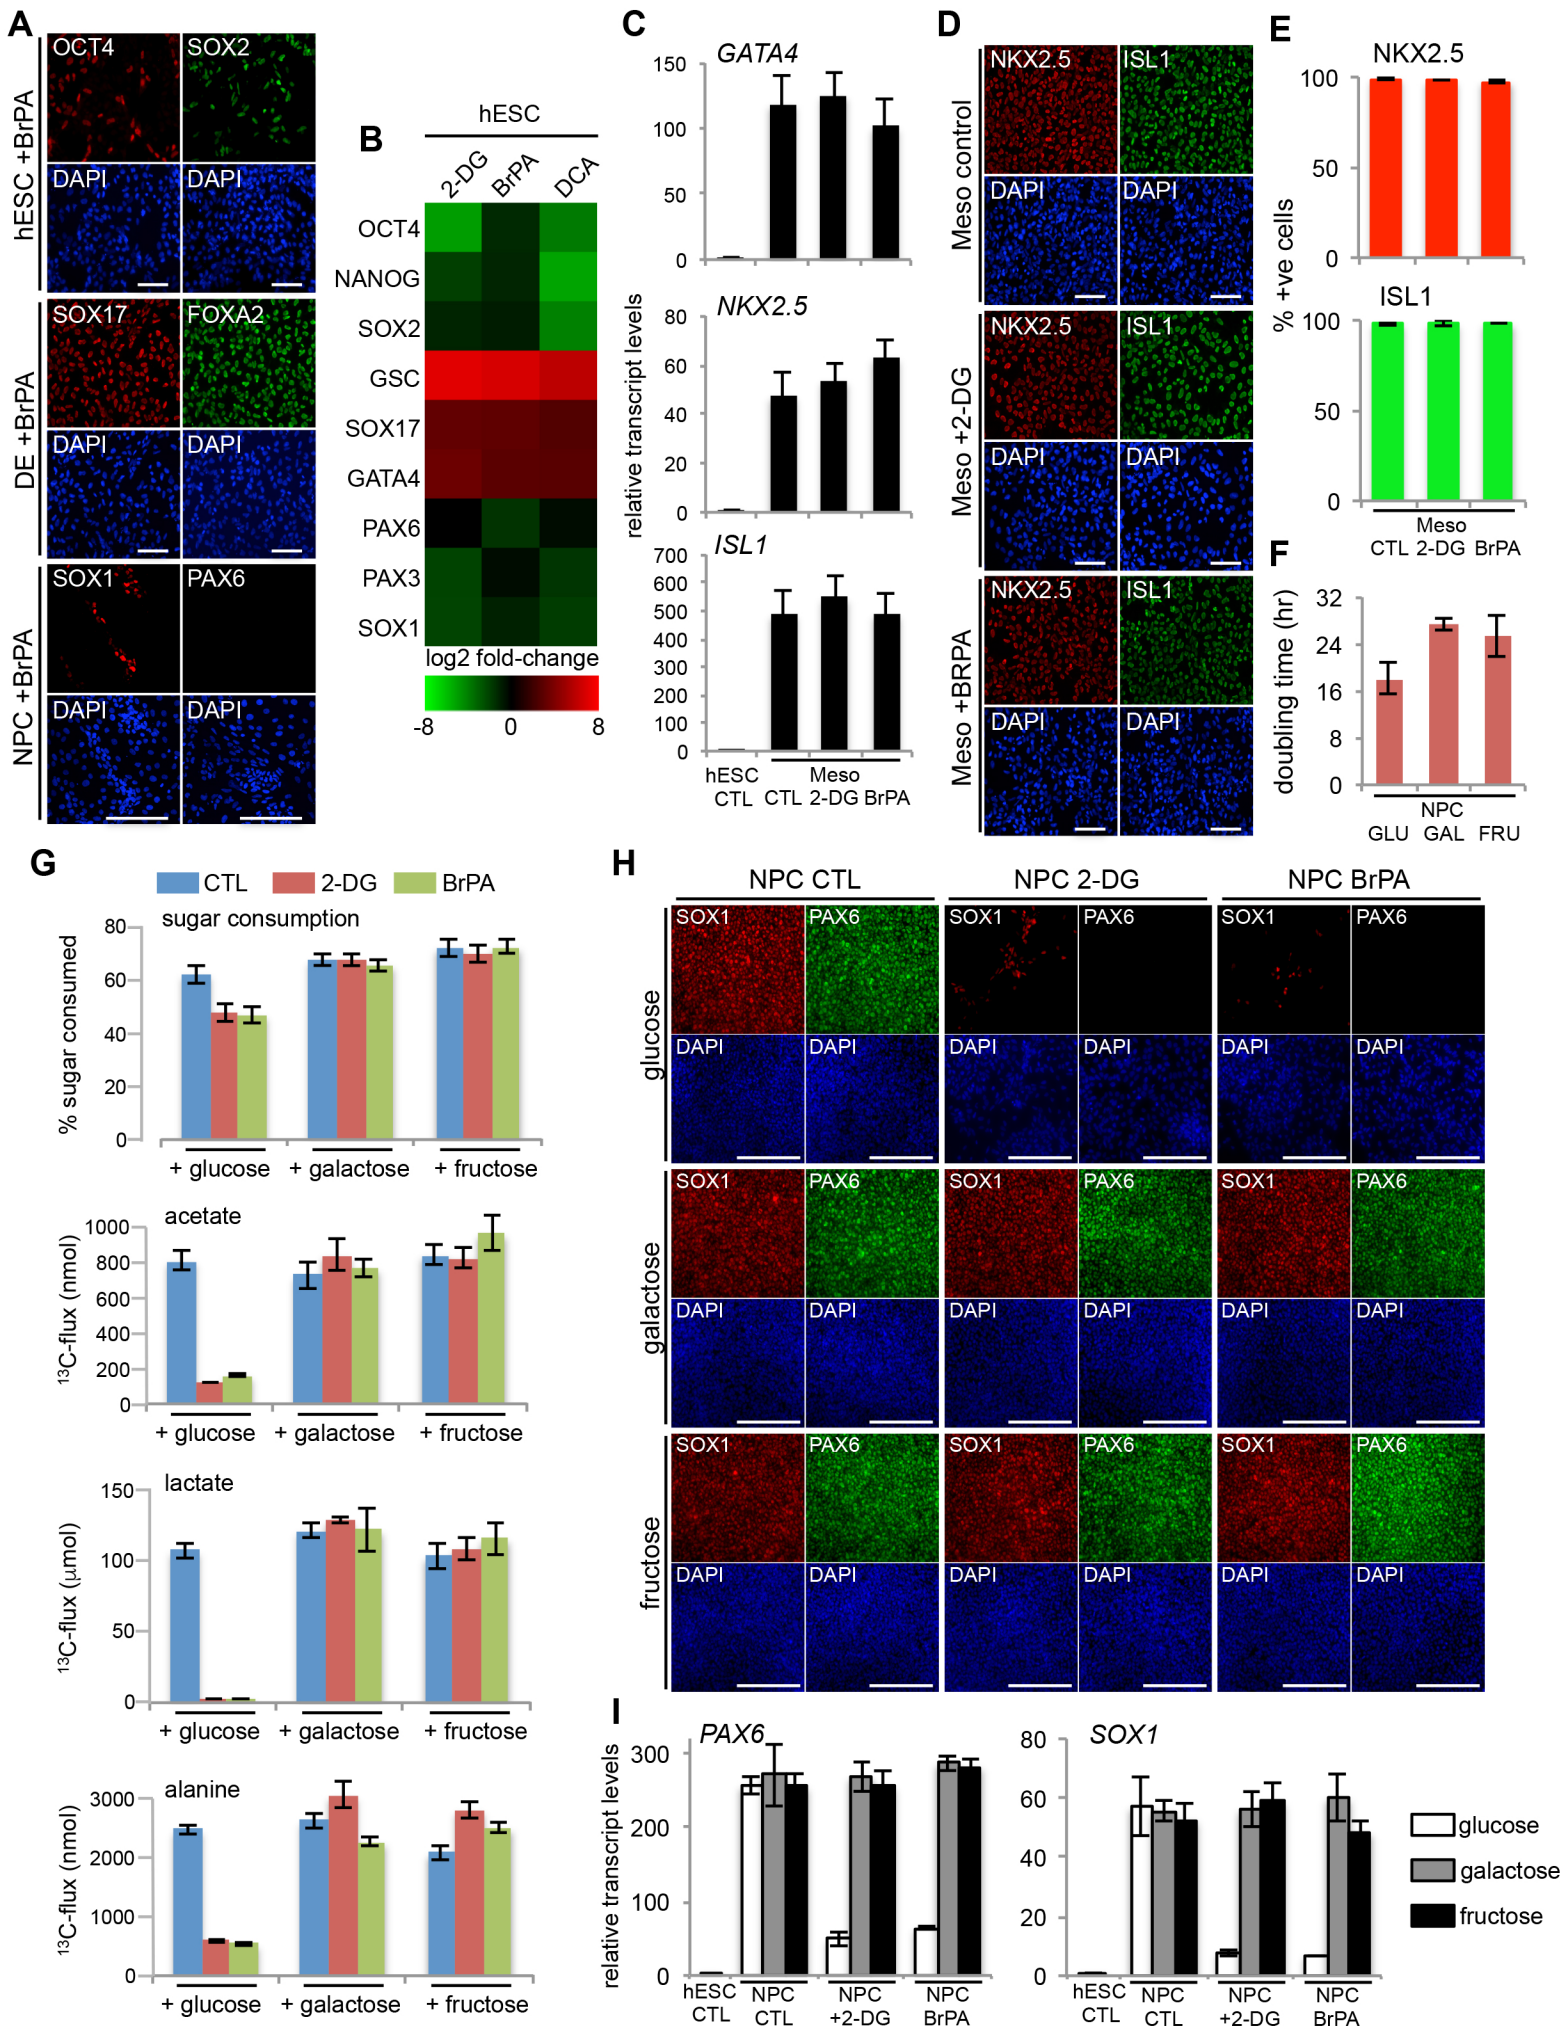



**Figure S3. Related to Figure 3. (A)** Immunofluorescence staining of WAO9 hESCs and WAO9-derived definitive endoderm (DE) and neural progenitor cells (NPCs); see Figure 3B, E, and H. **(B)** qRT-PCR heat map analysis of pluripotency, endoderm mesoderm and ectoderm markers in WAO9 hESCs treated with 2-DG, BrPA, and DCA treated cells relative to control treated cells. **(C)** Mesoderm (Meso) cells were analyzed by qRT-PCR analysis to determine transcript levels relative to WAO9 hESCs and, **(D)** immunostained and probed for indicated antibodies then, **(E)** scored for the % of cells expressing NKX2.5 and ISL1. **(F-I)** Galactose and fructose rescue inhibition of hexokinase in NPCs. WAO9 cells were transitioned onto glucose-free base media substituted with 17.5 mM glucose, or 17.5 mM galactose, or 17.5 mM fructose over a single passage (5 days). Cells were then maintained under these conditions for an additional passage (5 days), then differentiated to NPCs. **(F)** Doubling times in hours (hr) for NPCs cultured in glucose, galactose and fructose growth conditions. Cells were counted on day 4, 5 and 6. Each time point was repeated in biological triplicate and each replicate was counted 4 times (n=36). **(G)** Glucose-, galactose- or fructose-grown hESCs were plated and grown under NPC differentiation conditions with their respective carbon sources for 24 hr. The cells were then further differentiated for an additional 5 days in glucose, galactose or fructose-based NPC media with vector alone or with 2-DG (2.2 mM) or BrPA (17  $\mu$ M). On the day of harvest, cells were labeled with  $^{13}\text{C}$ -glucose,  $^{13}\text{C}$ -galactose, or  $^{13}\text{C}$ -fructose for 4 hr, as indicated. NMR-based metabolic flux analysis was standardized to 25 million cells per sample. **(H)** PAX6 and SOX1 immunofluorescence analysis on cells cultured under NPC conditions in the presence or absence of 2-DG and BrPA and, in the presence of different carbon sources. **(I)** qRT-PCR transcript analysis of *PAX6* and *SOX1* in samples corresponding to those on **(G,H)**. \*\*\*\*  $p < 0.0001$ , \*\*\*  $p < 0.001$ , \*\*  $p < 0.01$  for one-way ANOVA. Micron bars, 100  $\mu$ m. See also Figures S4 and S5.

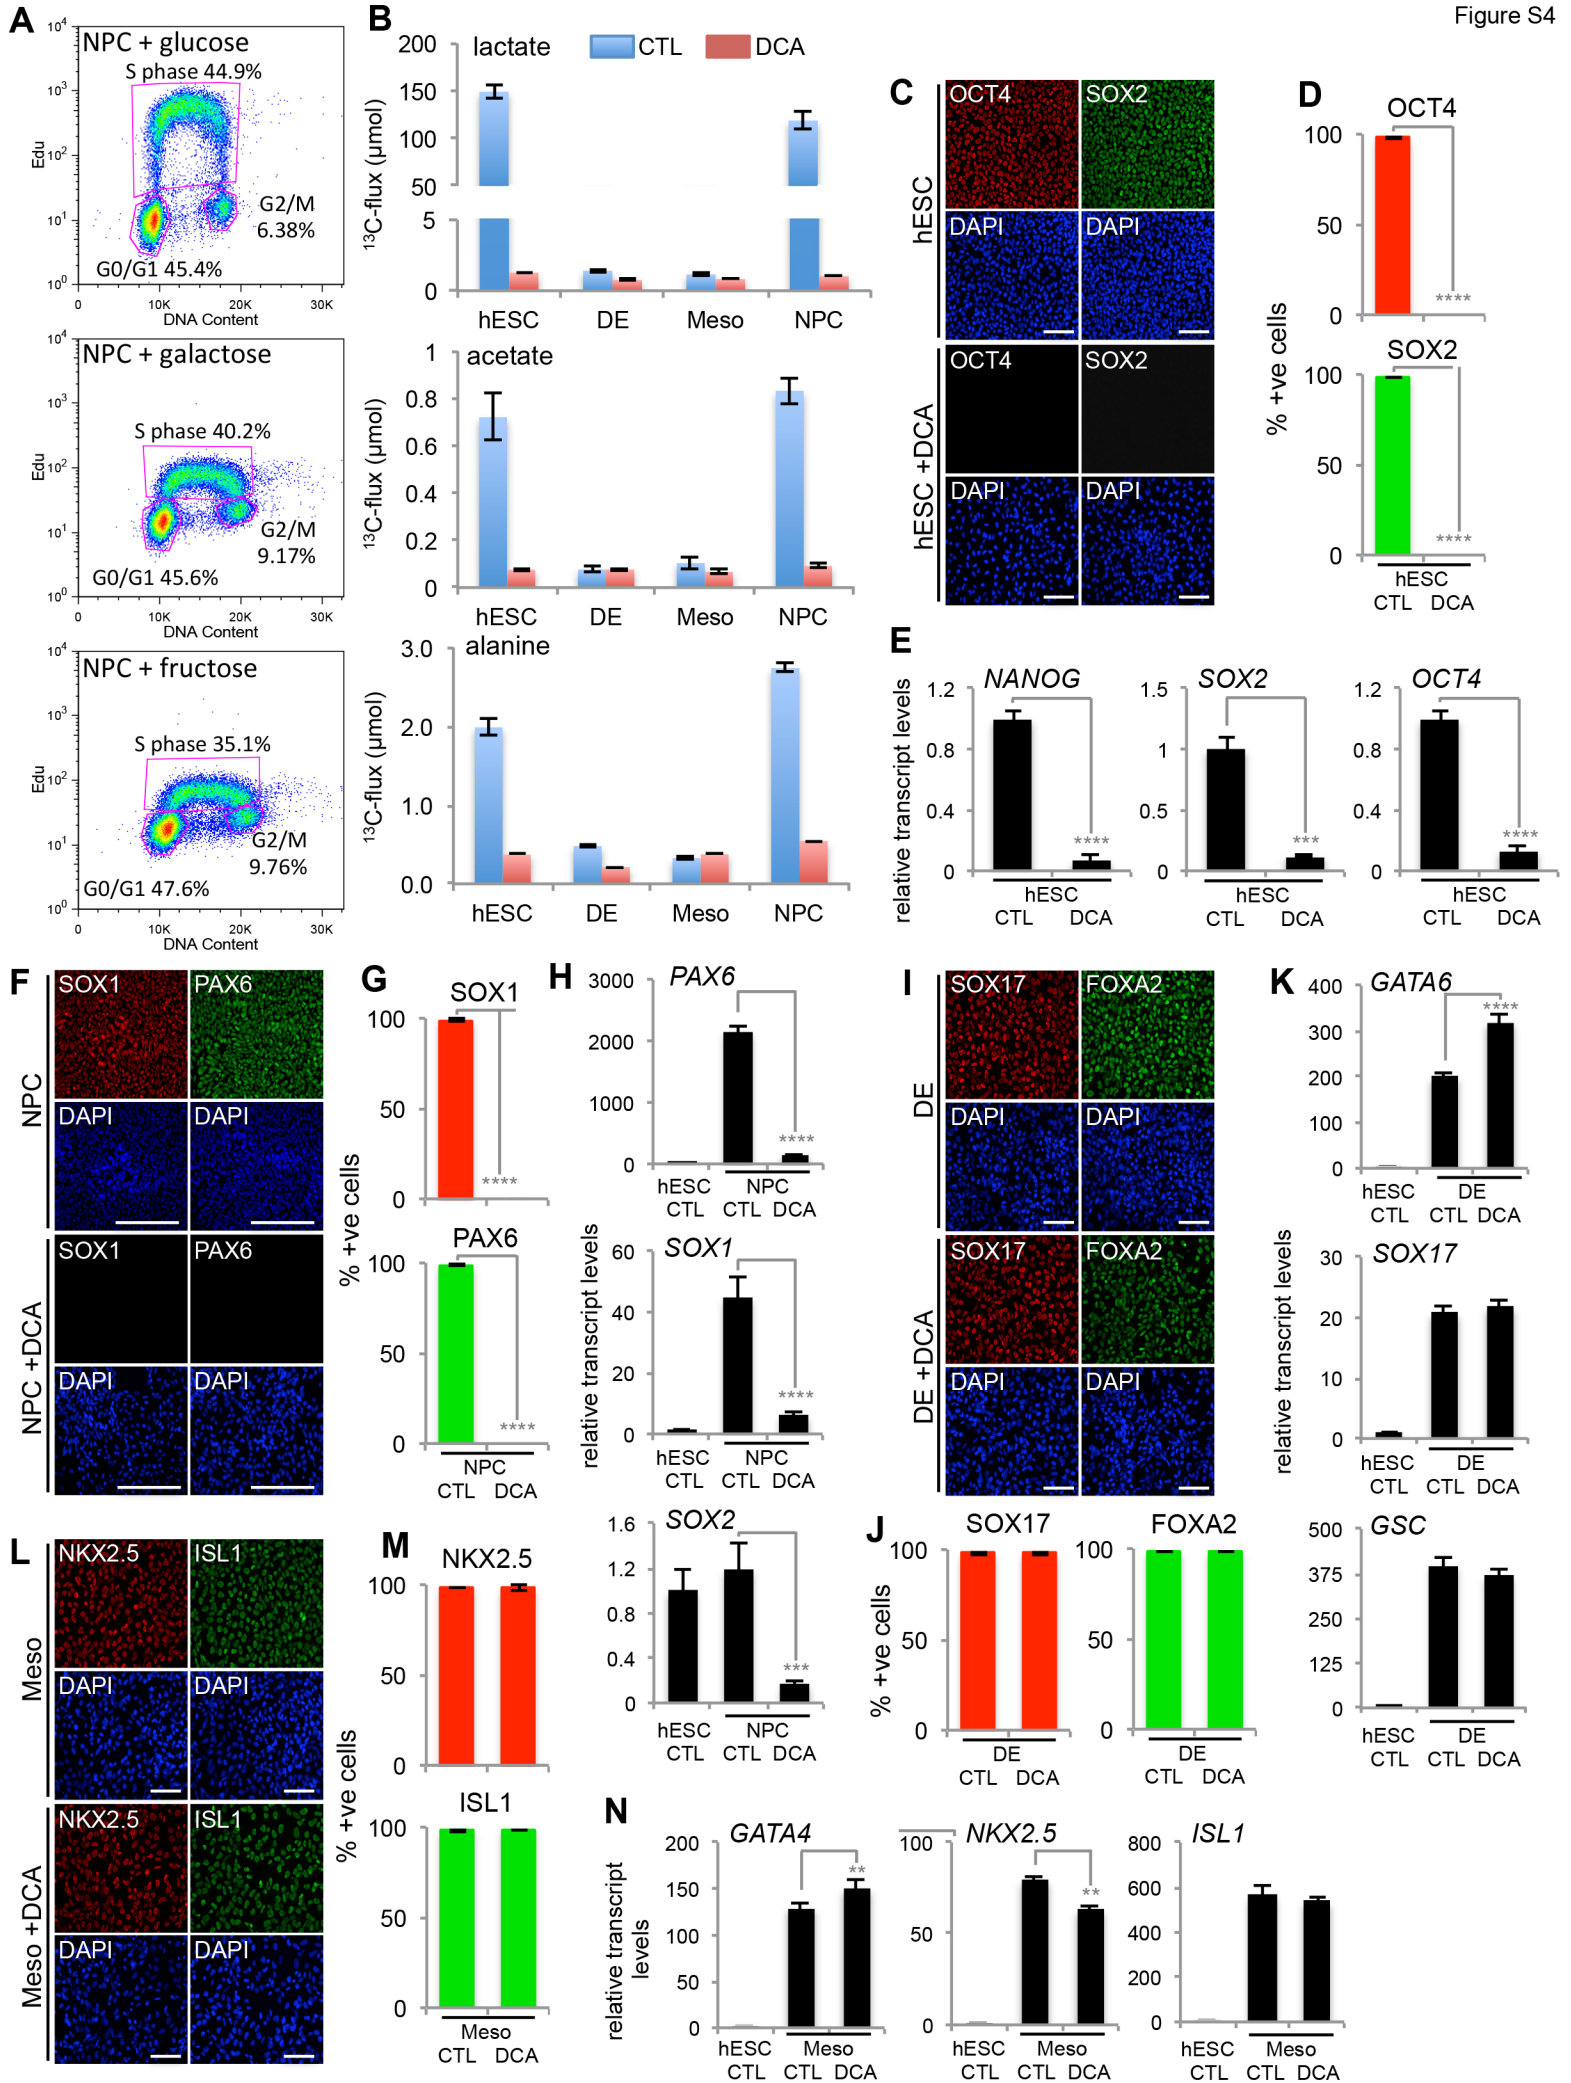

**Figure S4. Related to Figure 3. (A)** Percentage of neural progenitor cells (NPC) in different cell cycle phases when grown on glucose-free base media substituted with 17.5 mM glucose, or 17.5 mM galactose, or 17.5 mM fructose, as in Figure S3F. X-axis indicates cell DNA content by FxCycle dye staining and the Y-axis indicates cells in S-phase through incorporation of the nucleotide analog EdU, after a 2 hr pulse period. **(B)**  $^{13}\text{C}$ -glucose metabolic flux analysis over 4 hr in hESCs, definitive endoderm, nascent mesoderm (Meso) and early ectoderm (NPC). 24 hr after plating, cells were cultured for a further 3 days (hESCs, DE and Meso) or 5 days (NPC and NCSC) in the presence of dichloroacetic acid (DCA, 2.5 mM) where indicated. Units of  $^{13}\text{C}$ -flux are  $\mu\text{mol}$ , standardized to 25 million cells. Error bars represent the standard deviation. Cells were immunostained and probed for indicated antibodies, then scored for % cells expressing lineage markers and analyzed by qRT-PCR analysis to determine transcript levels in WA09 hESCs **(C-E)**, NPC **(F-H)**, DE **(I-K)** or Meso **(L-N)**. \*\*\*\*  $p < 0.0001$ , \*\*\*  $p < 0.001$ , \*\*  $p < 0.01$  for one-way ANOVA. All experiments were performed in biological triplicate. Error bars represent the standard deviation. Micron bars, 100  $\mu\text{m}$ . See also Figures S3 and S5.



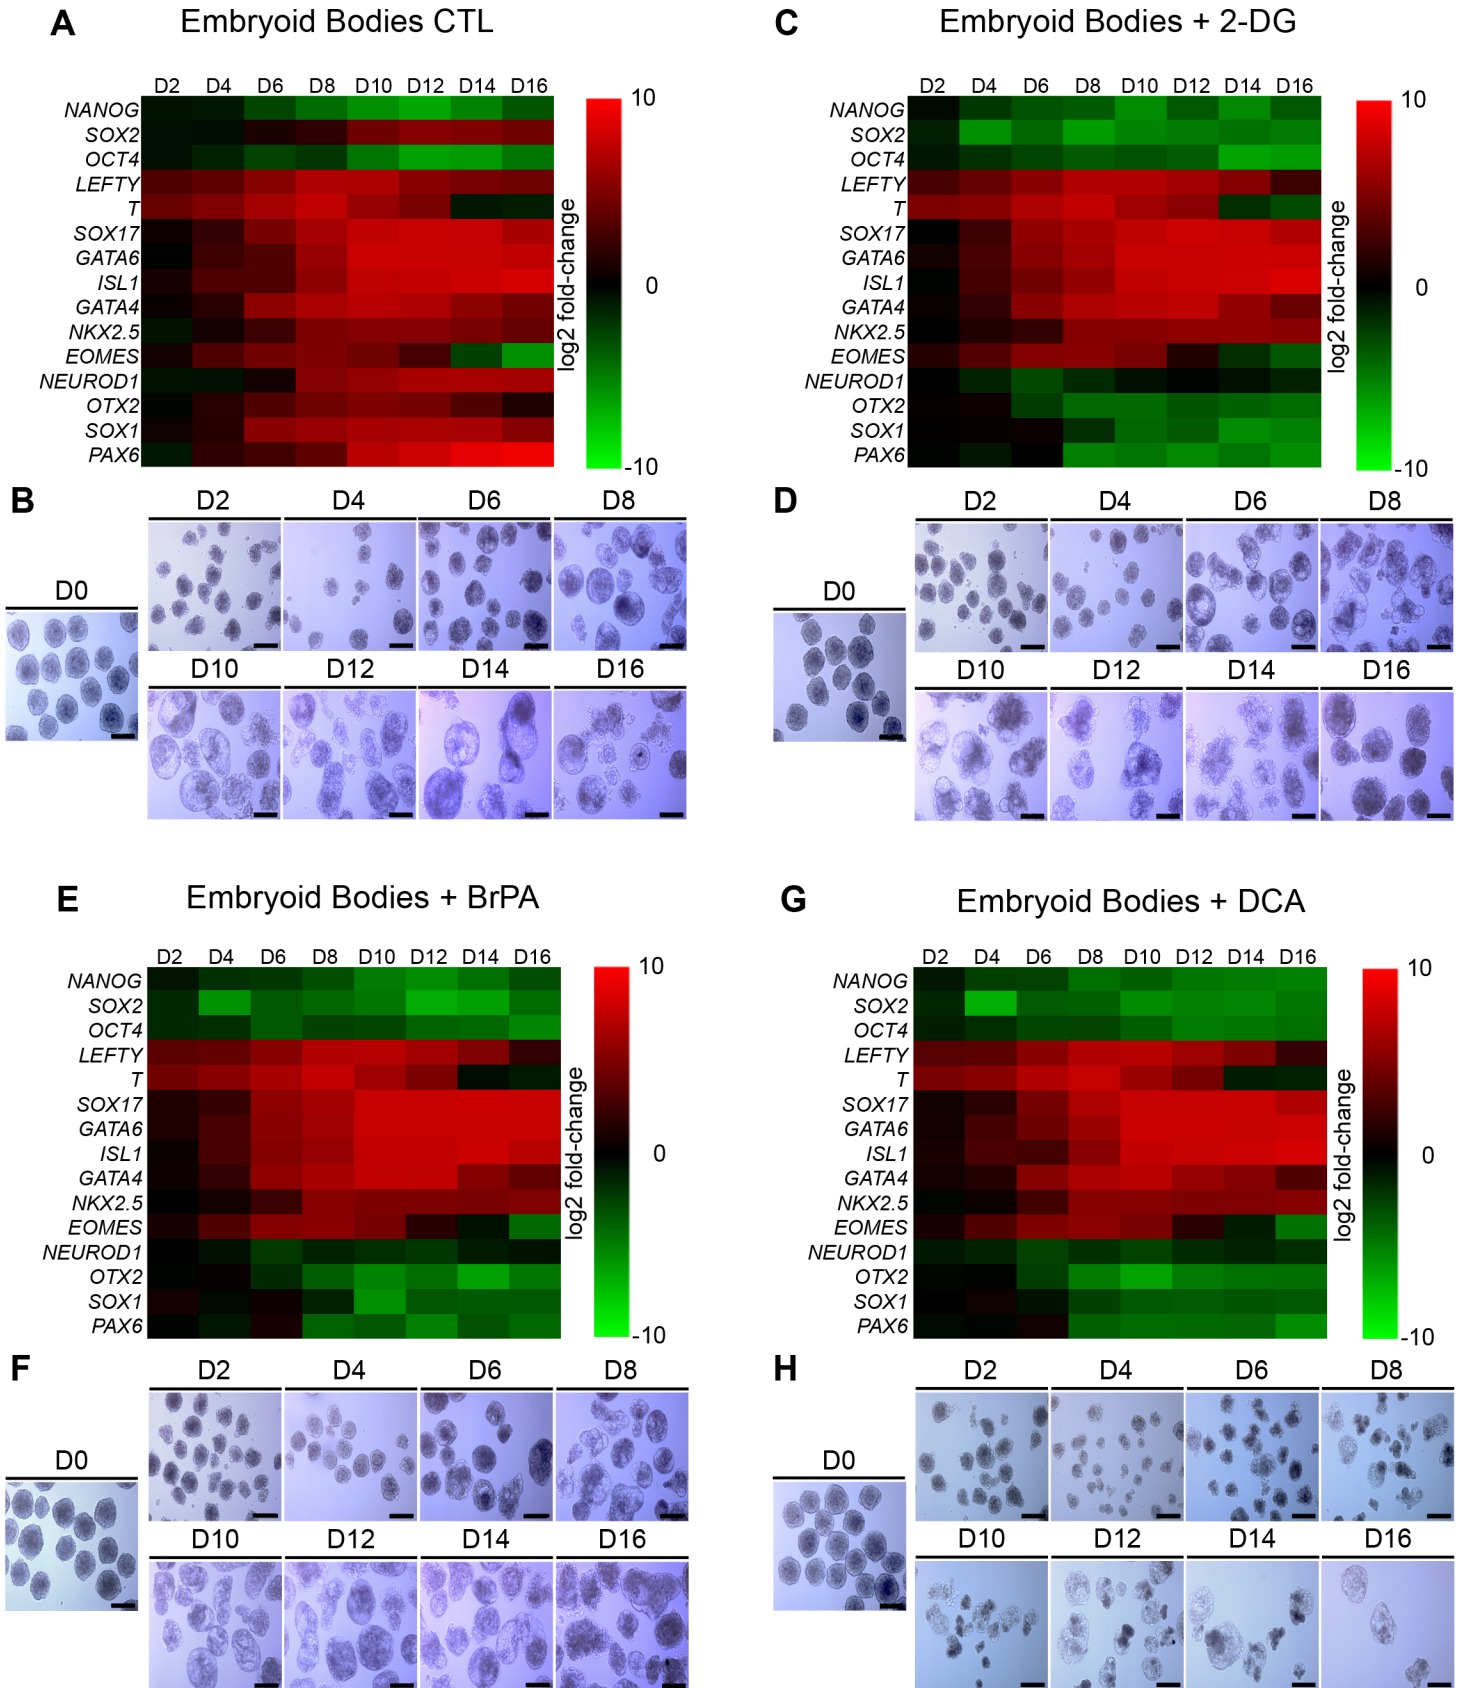

**Figure S5. Related to Figure 3. (A-H)** WA09 hESCs were aggregated and cultured in 10% fetal bovine serum for 16 days to induce embryoid body differentiation as a control CTL (A-B), or in the presence of 2-deoxyglucose (2-DG, 2.2 mM)(C-D), 3-bromopyruvate (BrPA, 17 $\mu$ M)(E-F) or dichloroacetic acid (DCA, 2.5 mM)(G-H). (A, C, E and G) qRT-PCT heat map analysis of lineage markers analyzed every 2 days of embryoid body differentiation for the conditions indicated. (B, D, F and H) Bright field images were taken every 2 days of embryoid body differentiation for the conditions indicated. Micron bars, 200  $\mu$ m See also Figures S3 and S4.

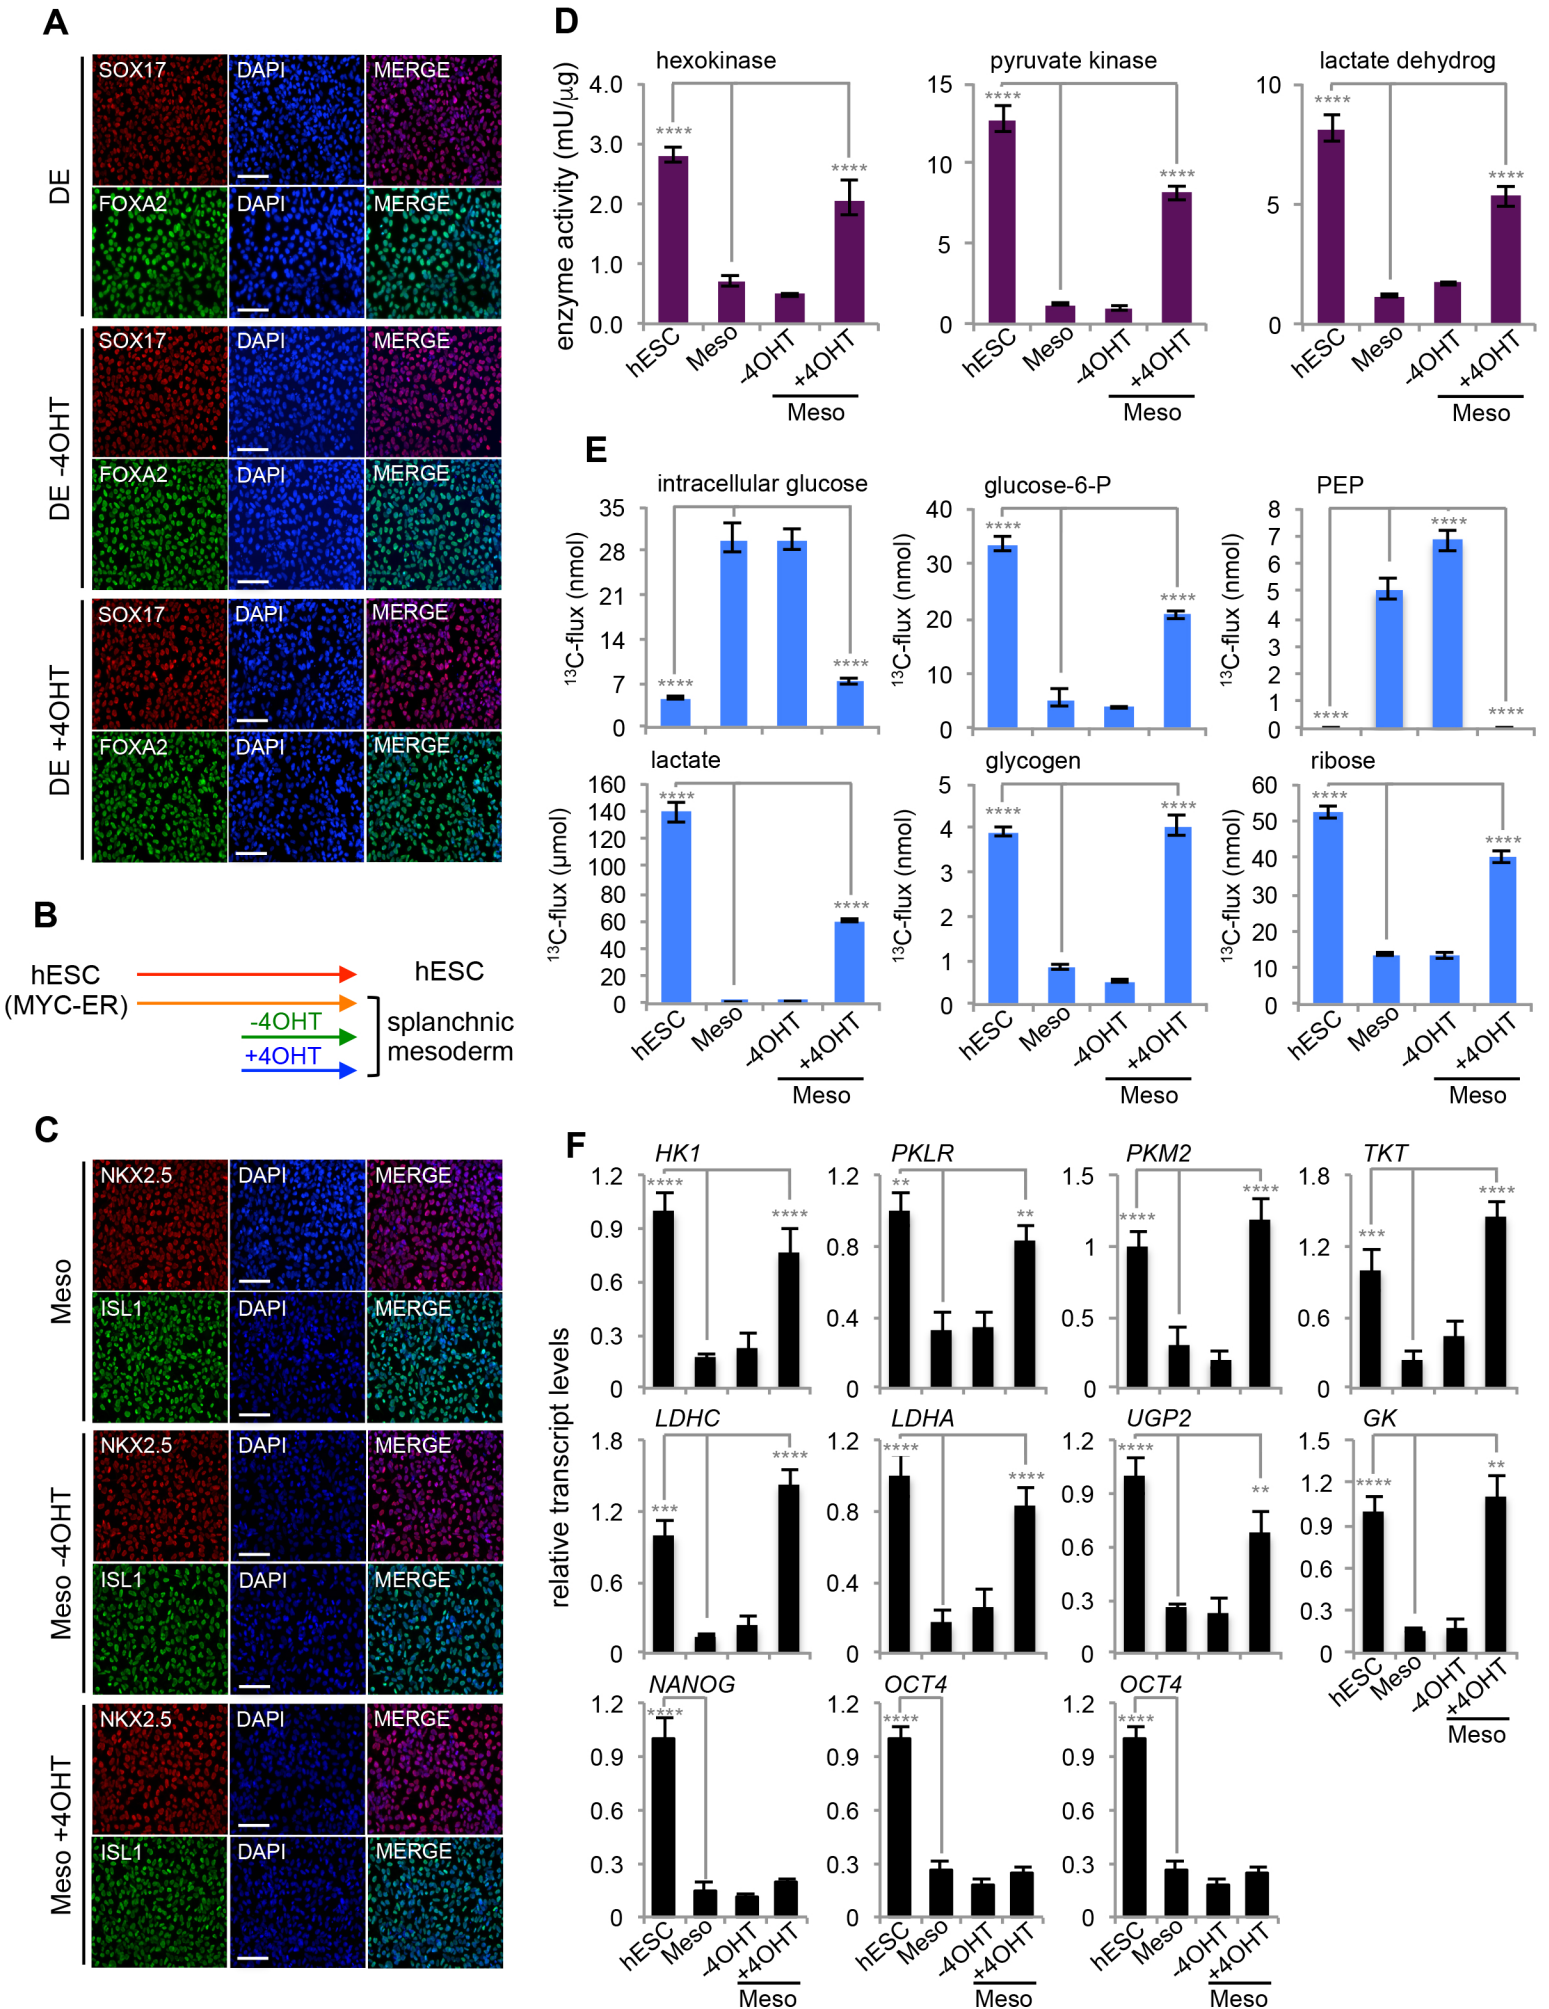



**Figure S6. Related to Figure 5. (A)** Immunofluorescence analysis of WA09-derived definitive endoderm (DE) or DE derived from a WA09 line carrying a MYC-ER transgene cultured with or without 4-hydroxytamoxifen (4OHT; 1  $\mu$ M), for the final 48 hours of differentiation. Cells were probed with antibodies for SOX17, FOXA2 and counterstained with DAPI. **(B)** Experimental scheme where a MYC-ER transgene is under control of 4OHT. **(C)** Immunofluorescence analysis of WA09-derived mesoderm (Meso) or Meso derived from a WA09 line carrying a MYC-ER transgene cultured with or without 4-hydroxytamoxifen (4OHT; 1  $\mu$ M), for the final 48 hours of differentiation. Cells were probed with antibodies for NKX2.5, ISL1 and counterstained with DAPI. **(D)** Enzyme activity assays for hexokinase, pyruvate kinase and lactate dehydrogenase corresponding to samples described in (B). **(E)**  $^{13}$ C-glucose NMR metabolic flux analysis following 4 hr labeling. **(F)** qRT-PCR analysis of metabolic genes for samples described in (B). \*\*\*\*  $p < 0.0001$ , \*\*\*  $p < 0.001$ , \*\*  $p < 0.01$  for one-way ANOVA. All experiments were performed in biological triplicate. Error bars represent the standard deviation. Micron bars, 100  $\mu$ m.

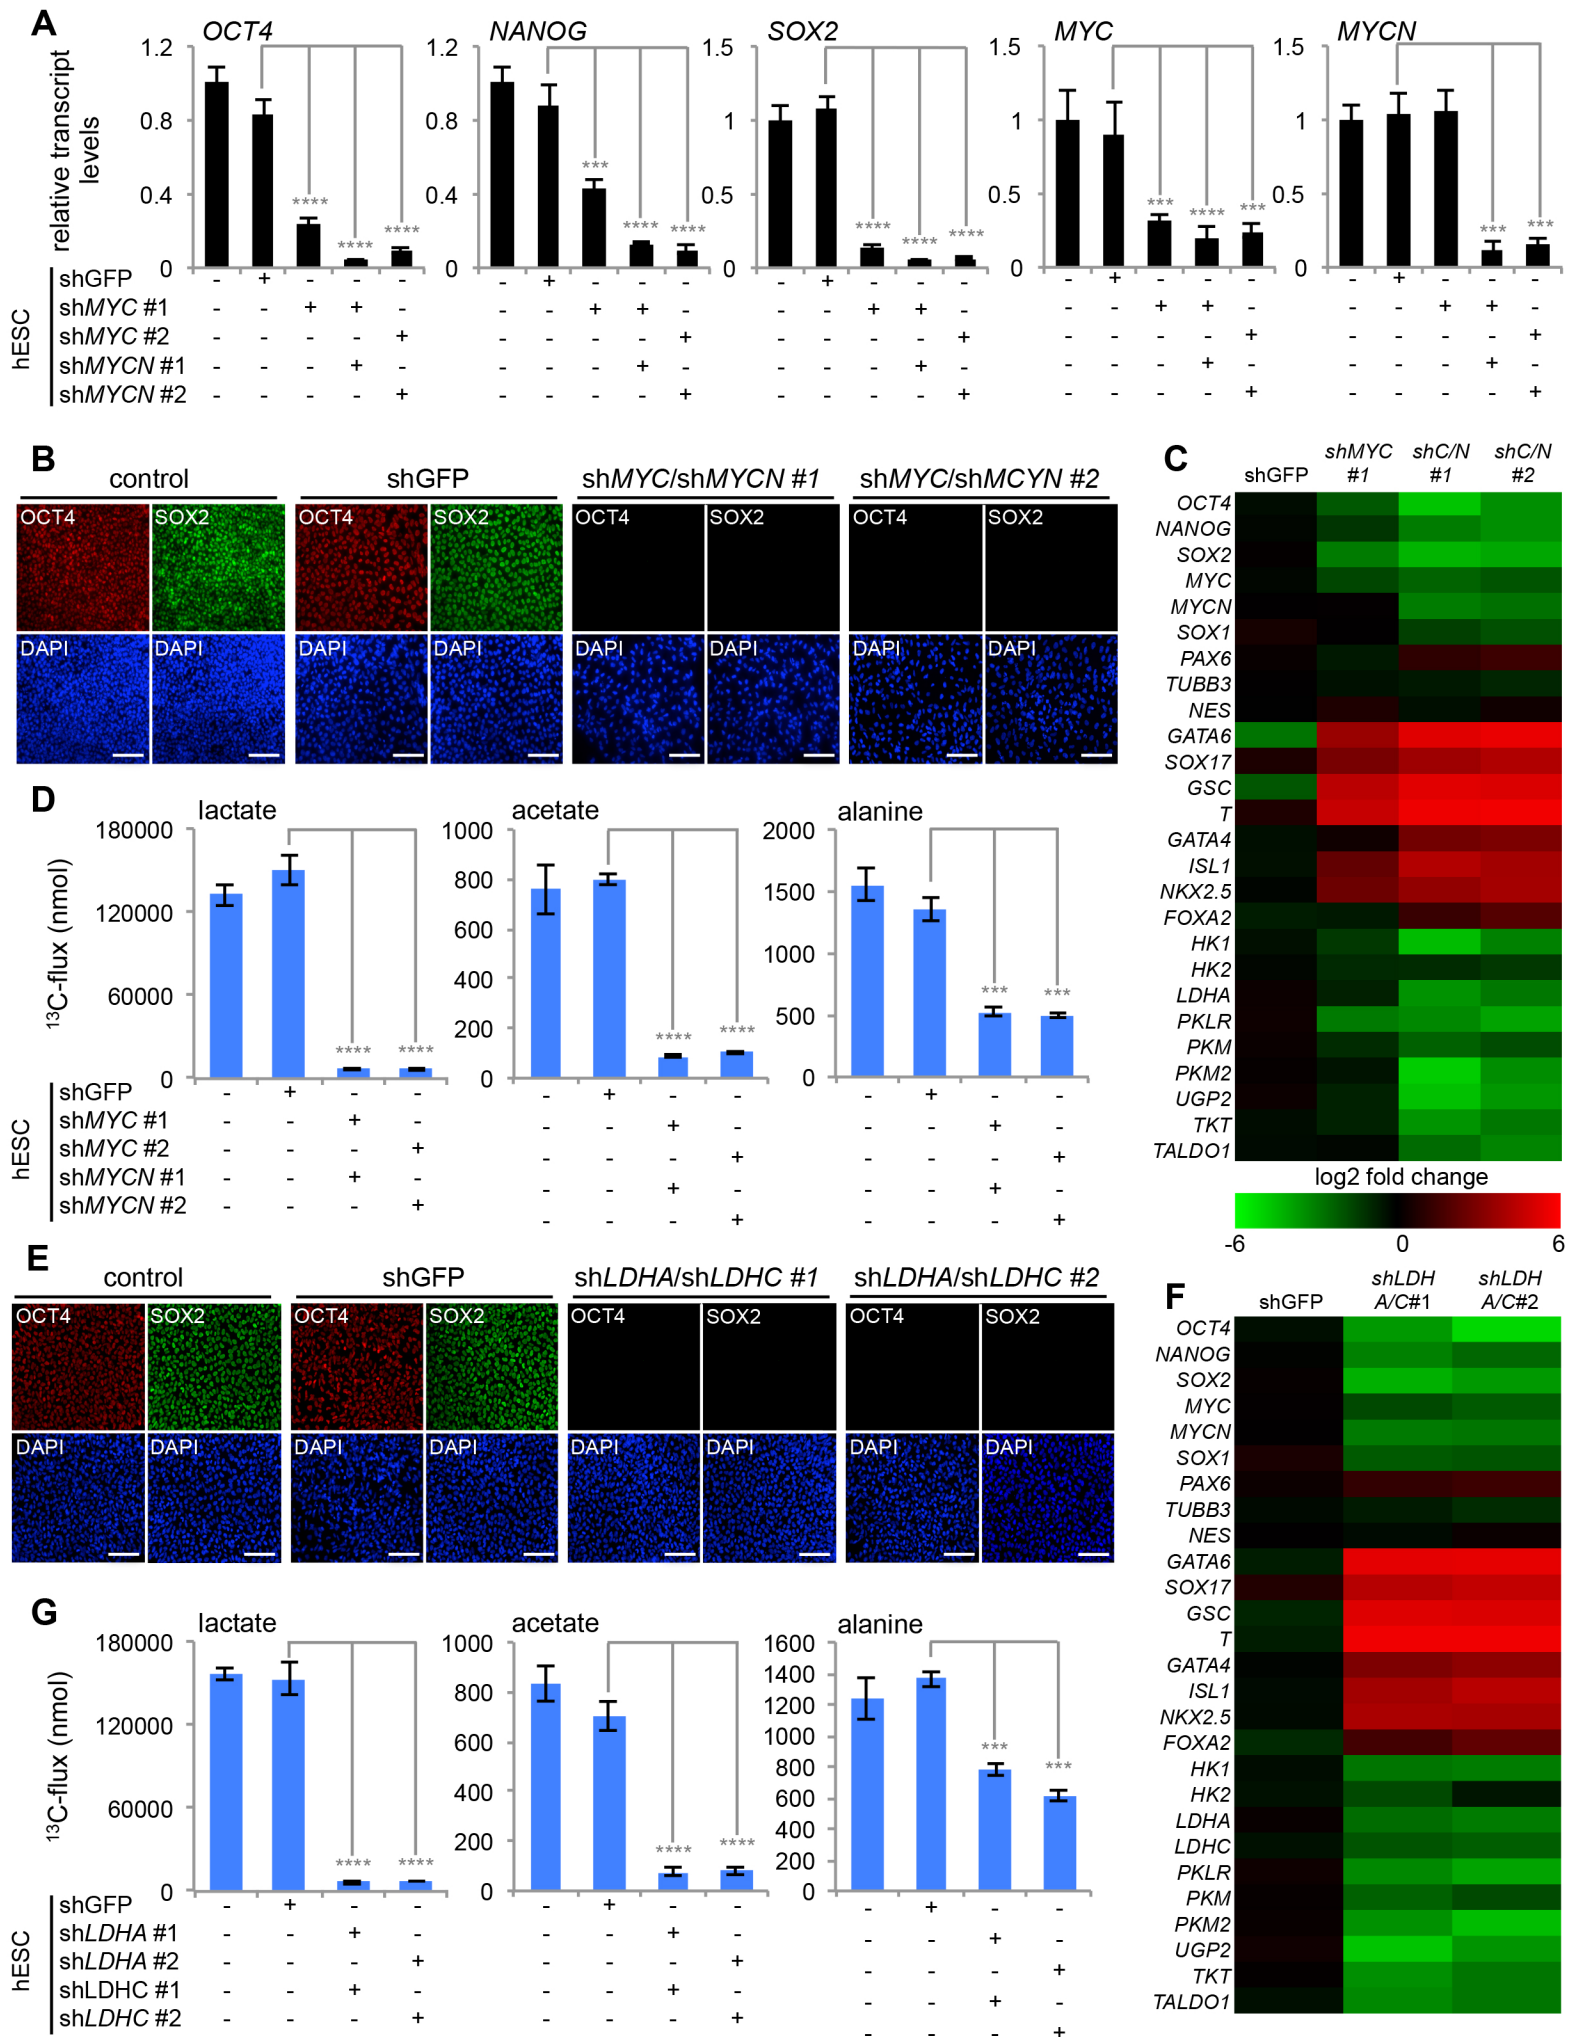

**Figure S7. Related to Figure 6. (A)** qRT-PCR analysis of transcripts in untreated WA09 hESCs and WA09 hESCs transduced with lentivirus expressing shRNA for GFP shRNA, *MYC* shRNA#1, co-expressing *MYC* shRNA#1 and *MYCN* shRNA#1, or co-expressing *MYC* shRNA#2 and *MYCN* shRNA#2 for 3 days. **(B)** Immunofluorescence of pluripotency markers in hESCs and hESCs transduced with lentivirus expressing GFP shRNA, co-expressing *MYC* shRNA#1 and *MYCN* shRNA#1, or co-expressing *MYC* shRNA#2 and *MYCN* shRNA#2 for 3 days. Cells were probed with antibodies for OCT4 and SOX2 then counterstained with DAPI. **(C)** qRT-PCR heat map analysis of lineage marker and metabolic 'switch' transcripts of hESCs transduced with lentivirus as in (B). **(D)** <sup>13</sup>C-glucose metabolic flux analysis of hESCs transduced with lentivirus as in (B). **(E)** Immunofluorescence of pluripotency markers in hESCs and hESCs transduced with lentivirus expressing GFP shRNA, co-expressing *LDHA* shRNA#1 and *LDHC* shRNA#1, or co-expressing *LDHA* shRNA#2 and *LDHC* shRNA#2 for 3 days. Cells were probed with antibodies for OCT4 and SOX2 then counterstained with DAPI. **(F)** qRT-PCR heat map analysis of lineage marker and metabolic 'switch' transcripts of hESCs transduced with lentivirus as in (E). **(G)** <sup>13</sup>C-glucose metabolic flux analysis of hESCs transduced with lentivirus as in (E). All experiments were performed in biological triplicate. Error bars represent the standard error of the mean. \*\*\*\*  $p < 0.0001$ , \*\*\*  $p < 0.001$ , \*\*  $p < 0.01$  for one-way ANOVA. Micron bars, 100  $\mu\text{m}$ .



## Pluripotency Gene Expression During Differentiation

| Gene   | Pathway      | log2 fold change over hESCs |           |           |            |           |
|--------|--------------|-----------------------------|-----------|-----------|------------|-----------|
|        |              | DE                          | SpIM      | NPC       | NCC        |           |
| KLF4   | Pluripotency |                             | -3.173154 | -4.190825 | -2.277282  | -2.307098 |
| NANOG  | Pluripotency |                             | -3.331884 | -3.034006 | -10.782607 | -9.962280 |
| POU5F1 | Pluripotency |                             | -2.999814 | -3.446101 | -8.510546  | -3.694330 |
| PRDM14 | Pluripotency |                             | -2.592410 | -6.367654 | -7.097048  | -6.195772 |
| ZFP42  | Pluripotency |                             | -2.092724 | -0.072368 | -3.308495  | -2.809496 |

## Definitive Endoderm Gene Expression During Differentiation

| Gene   | Pathway             | log2 fold change over hESCs |          |           |            |            |
|--------|---------------------|-----------------------------|----------|-----------|------------|------------|
|        |                     | DE                          | SpIM     | NPC       | NCC        |            |
| CXCR4  | Definitive Endoderm |                             | 5.668775 | 2.646484  | 3.052960   | 2.505940   |
| EOMES  | Definitive Endoderm |                             | 6.404072 | 0.183859  | -6.118045  | -6.108228  |
| FOXA2  | Definitive Endoderm |                             | 4.844044 | -1.721897 | -9.276017  | -2.378229  |
| GATA4  | Definitive Endoderm |                             | 5.466895 | 6.488035  | -5.100461  | -6.321379  |
| GSC    | Definitive Endoderm |                             | 6.583340 | -1.581418 | 1.906632   | -1.010280  |
| HNF4A  | Definitive Endoderm |                             | 6.178235 | 0.667016  | -1.064051  | -4.474930  |
| LEFTY1 | Definitive Endoderm |                             | 4.312236 | -4.583354 | -8.338195  | -8.825046  |
| LEFTY2 | Definitive Endoderm |                             | 4.375727 | -2.565824 | -9.714591  | -10.772287 |
| MIXL1  | Definitive Endoderm |                             | 4.639764 | -0.161733 | -5.270483  | -2.979131  |
| SOX17  | Definitive Endoderm |                             | 5.606928 | 0.725710  | -10.278984 | -10.404726 |

## Splanchnic Mesoderm Gene Expression During Differentiation

| Gene  | Pathway             | log2 fold change over hESCs |           |           |           |           |
|-------|---------------------|-----------------------------|-----------|-----------|-----------|-----------|
|       |                     | DE                          | SpIM      | NPC       | NCC       |           |
| BMP4  | Splanchnic Mesoderm |                             | 0.200105  | 2.961441  | -1.749198 | -2.194169 |
| FGF1  | Splanchnic Mesoderm |                             | 0.294504  | 2.491767  | -4.303811 | 1.791004  |
| FGF10 | Splanchnic Mesoderm |                             | 3.972917  | 7.532046  | 3.647088  | 4.870232  |
| FLT1  | Splanchnic Mesoderm |                             | -1.343571 | 2.269793  | -9.025288 | -7.018089 |
| FOXF1 | Splanchnic Mesoderm |                             | 4.332894  | 12.824778 | 0.000000  | 0.000000  |
| GATA6 | Splanchnic Mesoderm |                             | 6.169624  | 3.589645  | -4.179136 | -7.020126 |
| HAND1 | Splanchnic Mesoderm |                             | -0.979480 | 9.218725  | -4.153407 | -5.408205 |
| HAND2 | Splanchnic Mesoderm |                             | 0.911589  | 9.551576  | 0.398741  | -4.912937 |
| ISL1  | Splanchnic Mesoderm |                             | 1.244146  | 7.035355  | -8.154494 | -8.067838 |
| KDR   | Splanchnic Mesoderm |                             | -0.751757 | 3.049109  | -3.683870 | -4.006289 |
| TBX2  | Splanchnic Mesoderm |                             | -0.001316 | 8.915457  | -2.391443 | -2.305121 |
| TBX3  | Splanchnic Mesoderm |                             | 3.369438  | 8.113484  | -6.517687 | -4.301420 |

## Neural Progenitor Gene Expression During Differentiation

| Gene   | Pathway                | log2 fold change over hESCs |           |           |          |           |
|--------|------------------------|-----------------------------|-----------|-----------|----------|-----------|
|        |                        | DE                          | SpIM      | NPC       | NCC      |           |
| DLK1   | Neural Progenitor Cell |                             | 2.493684  | 0.276297  | 9.273796 | 7.911424  |
| FGF9   | Neural Progenitor Cell |                             | 1.473410  | 2.204802  | 6.390610 | 3.973812  |
| FOXP1  | Neural Progenitor Cell |                             | -0.623125 | 1.740852  | 7.697633 | -1.611979 |
| PAX6   | Neural Progenitor Cell |                             | 3.160407  | -0.216104 | 6.768757 | 1.948397  |
| POU3F2 | Neural Progenitor Cell |                             | -1.644328 | 1.830727  | 6.637449 | 5.497850  |
| SIX3   | Neural Progenitor Cell |                             | 2.883278  | -0.671157 | 8.130725 | -2.156777 |
| SOX1   | Neural Progenitor Cell |                             | -3.427894 | -3.312336 | 4.115514 | 5.073688  |

## Neural Crest Gene Expression During Differentiation

| Gene  | Pathway           | log2 fold change over hESCs |           |           |           |           |
|-------|-------------------|-----------------------------|-----------|-----------|-----------|-----------|
|       |                   | DE                          | SpIM      | NPC       | NCC       |           |
| FOXB1 | Neural Crest Cell |                             | -0.507943 | -3.298677 | 2.837312  | 6.329724  |
| HOXB2 | Neural Crest Cell |                             | 2.428695  | 7.977027  | -2.399459 | 7.436806  |
| ILDR2 | Neural Crest Cell |                             | -1.288922 | 0.022193  | 6.079583  | 7.535009  |
| NCAM1 | Neural Crest Cell |                             | 1.808666  | 4.147528  | 4.799465  | 3.874779  |
| OLIG3 | Neural Crest Cell |                             | -6.443079 | -8.213853 | -3.521014 | 5.949257  |
| PAX3  | Neural Crest Cell |                             | 1.639903  | 6.965333  | 4.668740  | 10.106077 |
| WNT8A | Neural Crest Cell |                             | 1.367015  | 0.643376  | -1.415005 | 4.034953  |

## Metabolic Genes That Do Not Change During Differentiation

| Gene         | Pathway            | log2 fold change over hESCs |           |           |           |           |
|--------------|--------------------|-----------------------------|-----------|-----------|-----------|-----------|
|              |                    | DE                          | SpIM      | NPC       | NCC       |           |
| ACSS2        | Acetate Synthesis  |                             | 1.487606  | 0.990889  | -1.895270 | 0.278523  |
| ACSS3        | Acetate Synthesis  |                             | 1.514499  | 0.119983  | -0.244679 | 0.111512  |
| AMT,NICN1    | Cysteine Synthesis |                             | -0.051919 | -0.606177 | -0.234320 | -0.377296 |
| CBS          | Cysteine Synthesis |                             | -0.287921 | -0.579454 | -1.516852 | -1.433267 |
| CTH          | Cysteine Synthesis |                             | -0.312763 | -0.264083 | -0.952939 | -1.389898 |
| DLAT         | Acetate Synthesis  |                             | 0.082696  | -0.159619 | -1.421213 | -0.738727 |
| DLD          | Acetate Synthesis  |                             | -0.196138 | -0.204578 | -1.066833 | -1.024097 |
| ENO1         | Glycolysis         |                             | 0.757081  | 0.232158  | -0.644414 | 0.661793  |
| ENO1-AS1     | Glycolysis         |                             | 0.362028  | -0.166477 | -0.683830 | -1.433399 |
| ENO2,LRRRC23 | Glycolysis         |                             | -1.073721 | -0.348490 | 0.276054  | 0.497133  |
| ENO3         | Glycolysis         |                             | -0.427934 | -0.028448 | 0.719242  | 1.512329  |

## Metabolic Genes That Do Not Change During Differentiation Continued

| Gene         | Pathway                   | DE        | log2 fold change over hESCs |           |           | NCC |
|--------------|---------------------------|-----------|-----------------------------|-----------|-----------|-----|
|              |                           |           | SpIM                        | NPC       |           |     |
| ENO4         | Glycolysis                | 1.081168  | -0.190592                   | 1.055834  | -0.067863 |     |
| FBP1         | Glycolysis                | 0.318078  | 0.341743                    | -1.621244 | -0.629184 |     |
| FBP2         | Glycolysis                | 0.004424  | 0.523966                    | 2.197043  | 1.083456  |     |
| G6PD         | Pentose Phosphate Pathway | 0.539282  | 0.497256                    | -0.795225 | 0.532202  |     |
| GAPDH        | Glycolysis                | -0.138498 | -0.287382                   | -0.442516 | 0.398546  |     |
| GBE1         | Glycogen Synthesis        | 0.130743  | 1.243874                    | 1.093198  | 2.757731  |     |
| GCK          | Glycolysis                | -0.906023 | -2.469274                   | -5.952966 | -1.946830 |     |
| GCLC         | Glutathione Synthesis     | -0.072580 | -1.126622                   | -1.194829 | -0.904549 |     |
| GCLM         | Glutathione Synthesis     | -0.024173 | 1.524666                    | -2.432630 | 2.854309  |     |
| GCSH         | Cysteine Synthesis        | 0.449162  | -0.352752                   | -0.652549 | -0.132505 |     |
| GFPT1        | UDP-GlcNac Synthesis      | -0.015703 | 0.137117                    | -1.505189 | -0.713787 |     |
| GFPT2        | UDP-GlcNac Synthesis      | -0.545241 | -1.032710                   | -2.093027 | -2.259530 |     |
| GK2          | Glycerol Synthesis        | 0.000000  | 3.787056                    | 0.000000  | 0.000000  |     |
| GK3P         | Glycerol Synthesis        | -0.805642 | -0.672326                   | -0.050156 | -0.346149 |     |
| GK5          | Glycerol Synthesis        | -0.078488 | -0.009743                   | 1.314329  | 1.551809  |     |
| GLDC         | Cysteine Synthesis        | -1.390186 | -0.870147                   | -0.835756 | -2.053789 |     |
| GPNPAT1      | UDP-GlcNac Synthesis      | -0.335352 | -0.962786                   | -1.497488 | -1.074860 |     |
| GPT          | Alanine Synthesis         | 0.502870  | -0.851163                   | -0.434115 | -0.241868 |     |
| GPT2         | Alanine Synthesis         | -0.512235 | -0.264590                   | -0.344619 | -0.747844 |     |
| GSS          | Glutathione Synthesis     | 6.750928  | 0.073857                    | -0.226385 | -0.170855 |     |
| GYS1         | Glycogen Synthesis        | 0.513184  | 0.770647                    | -0.247798 | -0.229391 |     |
| GYS2         | Glycogen Synthesis        | 2.011638  | 4.656649                    | -3.148524 | 0.590444  |     |
| HK2          | Glycolysis                | -1.430568 | -1.046071                   | -0.222024 | 0.937562  |     |
| LDHAL6B      | Glycolysis                | 4.745221  | 0.000000                    | 5.522373  | 4.461843  |     |
| LDHB         | Glycolysis                | -0.357299 | -0.606726                   | -1.050780 | -0.211688 |     |
| MPC1         | Acetate Synthesis         | -0.572330 | 0.611876                    | -1.276846 | 0.116017  |     |
| MPC1L        | Acetate Synthesis         | 0.000000  | 0.000000                    | 0.000000  | 0.000000  |     |
| MPC2         | Acetate Synthesis         | 0.303458  | 0.790915                    | -0.465668 | -0.044965 |     |
| PCK1         | Glycolysis                | 2.085343  | -2.791076                   | 0.791856  | -0.199815 |     |
| PCK2         | Glycolysis                | -0.934111 | -0.023690                   | -1.566246 | -1.621378 |     |
| PDHA1        | Acetate Synthesis         | 0.010744  | -0.034505                   | -1.116590 | -0.352136 |     |
| PDHA2        | Acetate Synthesis         | 0.585053  | 0.007628                    | -1.009428 | -0.264661 |     |
| PDHB         | Acetate Synthesis         | 0.786040  | -0.498255                   | -1.485763 | -0.974935 |     |
| PDHX         | Acetate Synthesis         | -0.179092 | -0.487517                   | -1.259007 | -0.611034 |     |
| PFKL         | Glycolysis                | 1.075353  | 0.401012                    | 0.051100  | 0.509836  |     |
| PFKM         | Glycolysis                | 0.049463  | 0.029069                    | 0.928407  | 0.537045  |     |
| PFKP         | Glycolysis                | -0.239436 | 1.917099                    | -1.153647 | -0.408951 |     |
| PGAM1        | Glycolysis                | 0.181542  | -0.083265                   | -0.404225 | 0.342419  |     |
| PGAM1P5      | Glycolysis                | 0.093678  | -0.474565                   | -0.586307 | 0.166588  |     |
| PGAM4        | Glycolysis                | 0.163281  | -0.200700                   | -0.319031 | 0.375523  |     |
| PGAM5        | Glycolysis                | -0.316427 | -0.576164                   | -1.141041 | -0.811630 |     |
| PGD          | Pentose Phosphate Pathway | 0.202128  | -0.376871                   | -0.454336 | 0.161930  |     |
| PGK1         | Glycolysis                | 0.007423  | -0.205290                   | -0.242146 | 0.946452  |     |
| PGK2         | Glycolysis                | 1.955918  | 0.102789                    | 1.114214  | -0.268738 |     |
| PGLS         | Pentose Phosphate Pathway | 1.218774  | 1.091150                    | 0.472890  | 0.413669  |     |
| PGM1         | Glycogen Synthesis        | 1.660509  | -0.822978                   | -2.461635 | -0.747500 |     |
| PGM2         | Glycogen Synthesis        | -0.189654 | 0.660623                    | -1.693061 | -0.496548 |     |
| PGM2L1       | Glycogen Synthesis        | -0.155362 | -0.694360                   | -0.896342 | -2.151411 |     |
| PGM3         | Glycogen Synthesis        | 0.250487  | 0.766598                    | -0.629725 | 0.245196  |     |
| PGM5         | Glycogen Synthesis        | 2.337968  | 6.797313                    | 4.359064  | 0.635568  |     |
| PGM5-AS1     | Glycogen Synthesis        | 0.000000  | 0.128476                    | -0.440655 | 0.970590  |     |
| PGM5P2       | Glycogen Synthesis        | 0.736089  | 2.454167                    | 1.613584  | -0.474296 |     |
| PHGDH        | Cysteine Synthesis        | -1.204325 | -0.590222                   | -1.000717 | -0.948131 |     |
| PSPH         | Cysteine Synthesis        | -0.089370 | -0.009318                   | -0.201282 | -0.856129 |     |
| RPE          | Pentose Phosphate Pathway | -0.461536 | -0.496626                   | -1.011676 | -0.688311 |     |
| RPIA         | Pentose Phosphate Pathway | -0.240813 | -0.038142                   | -0.593137 | -0.654932 |     |
| SHMT1, TOP3A | Cysteine Synthesis        | -0.747739 | 0.426925                    | -0.269473 | -0.373987 |     |
| SHMT2        | Cysteine Synthesis        | -0.747949 | -0.161237                   | -0.370181 | 0.085102  |     |
| SLC2A1-AS1   | Glucose Transporters      | -0.853790 | -0.114143                   | 1.298722  | 2.515161  |     |
| SLC2A10      | Glucose Transporters      | 0.783191  | 1.060499                    | 0.434643  | -0.115255 |     |
| SLC2A11      | Glucose Transporters      | 0.129494  | 0.296128                    | 0.522482  | 0.596980  |     |
| SLC2A12      | Glucose Transporters      | 0.188638  | -0.121903                   | 1.673748  | 0.477801  |     |
| SLC2A13      | Glucose Transporters      | 0.481329  | 0.636043                    | -0.569662 | 0.211400  |     |
| SLC2A14      | Glucose Transporters      | 2.380354  | 1.372044                    | -0.683505 | 1.389201  |     |
| SLC2A2       | Glucose Transporters      | 0.000000  | 0.000000                    | 0.000000  | 0.000000  |     |
| SLC2A3       | Glucose Transporters      | 2.822870  | 1.605607                    | -0.422098 | 1.654429  |     |
| SLC2A4       | Glucose Transporters      | 0.646290  | -1.271195                   | -1.634528 | 1.113473  |     |
| SLC2A4RG     | Glucose Transporters      | 1.040207  | 1.208481                    | 0.257236  | 0.300861  |     |
| SLC2A5       | Glucose Transporters      | -0.316449 | -0.103270                   | -5.555604 | -5.459805 |     |

## Metabolic Genes That Do Not Change During Differentiation Continued

| Gene   | Pathway              | log2 fold change over hESCs |           |           |           |
|--------|----------------------|-----------------------------|-----------|-----------|-----------|
|        |                      | DE                          | SpIM      | NPC       | NCC       |
| SLC2A6 | Glucose Transporters | 0.573633                    | 0.268766  | -1.893726 | -0.661408 |
| SLC2A7 | Glucose Transporters | 0.000000                    | 0.000000  | 0.000000  | 0.000000  |
| SLC2A8 | Glucose Transporters | -0.054026                   | 0.646370  | -0.903229 | -0.504788 |
| SLC2A9 | Glucose Transporters | 1.866827                    | 3.018429  | -0.175891 | -0.176386 |
| TPI1   | Glycolysis           | -0.466675                   | -0.793688 | -1.035595 | -0.083561 |
| UAP1   | UDP-GlcNac Synthesis | 0.230896                    | 0.491817  | -0.635158 | -1.497488 |

## Metabolic Target Genes That Do Change During Differentiation

| Gene    | Pathway                   | log2 fold change over hESCs |           |           |           |
|---------|---------------------------|-----------------------------|-----------|-----------|-----------|
|         |                           | DE                          | SpIM      | NPC       | NCC       |
| ACOT12  | Acetate Synthesis         | -6.678269                   | -6.668488 | -2.603160 | 0.635880  |
| ACSS1   | Acetate Synthesis         | -1.660677                   | -1.794854 | -6.696773 | 0.682714  |
| GAPDHS  | Glycolysis                | -2.809471                   | -1.540548 | 0.007030  | 0.293468  |
| GK      | Glycerol Synthesis        | -2.867121                   | -3.321958 | 0.616713  | 0.651652  |
| GPI     | Glycolysis                | -2.617558                   | -3.876663 | -0.033789 | -0.604992 |
| HK1     | Glycolysis                | -2.328135                   | -3.141469 | -0.282716 | -0.059148 |
| HK3     | Glycolysis                | -3.351275                   | -3.483042 | -0.310056 | -3.275697 |
| LDHA    | Glycolysis                | -3.854462                   | -3.402367 | 0.375032  | 1.315792  |
| LDHAL6A | Glycolysis                | -6.252194                   | -6.231780 | -2.087180 | -2.053883 |
| LDHC    | Glycolysis                | -3.847299                   | -2.715817 | -0.991612 | -0.935105 |
| LDHD    | Glycolysis                | -3.461847                   | -5.882240 | -1.378907 | -1.513888 |
| PGAM2   | Glycolysis                | -1.623741                   | -2.872233 | 0.442770  | 1.095669  |
| PKLR    | Glycolysis                | -4.488534                   | -4.144053 | 1.474035  | 0.716112  |
| PKM     | Glycolysis                | -2.920433                   | -2.379239 | -0.350156 | 0.147448  |
| PSAT1   | Cysteine Synthesis        | -2.164498                   | -3.961949 | -0.851356 | 0.260383  |
| SLC2A1  | Glucose Transporters      | -1.917720                   | -2.234013 | 2.057408  | 2.935043  |
| TALDO1  | Pentose Phosphate Pathway | -3.440604                   | -2.900132 | 0.730205  | -0.049308 |
| TKT     | Pentose Phosphate Pathway | -3.406111                   | -2.974722 | 0.496059  | 0.258944  |
| UGP2    | Glycogen Synthesis        | -3.542808                   | -4.455956 | 1.150647  | -0.233097 |

**Table S1. Related to Figure 4.** Table showing levels of pluripotency, definitive endoderm, mesoderm and neural progenitor cell-specific transcripts, represented in Figure 4C. Metabolic transcripts, defined by gene ontology analysis, that remain constant during differentiation ('non-switch') or those that mirror metabolic switching ('switch' transcripts) are shown.

| Primary Antibody | Application | Dilution or Concentration | Vendor                    | Product Number |
|------------------|-------------|---------------------------|---------------------------|----------------|
| CDK2             | WB          | 1:2000                    | Santa Cruz Biotechnology  | sc_163         |
| FOXA2            | IF          | 1:40                      | R&D Systems               | AF2400         |
| HK1              | WB          | 1:1000                    | Santa Cruz Biotechnology  | sc_6521        |
| HK2              | WB          | 1:1000                    | Santa Cruz Biotechnology  | sc_6518        |
| IGG              | ChIP        | 1 ug/million cells        | Abcam                     | ab46540        |
| ISL1             | IF          | 1:20                      | R&D systems               | AF1837         |
| LDHA             | WB          | 1:1000                    | Santa Cruz Biotechnology  | sc-27238       |
| LDHC             | WB          | 1:1000                    | Santa Cruz Biotechnology  | sc-27230       |
| MYC              | WB          | 1:1000                    | Santa Cruz Biotechnology  | sc_764         |
| MYC              | ChIP        | 1 ug/million cells        | Abcam                     | ab56           |
| MYCN             | WB          | 1:1000                    | Santa Cruz Biotechnology  | sc_791         |
| MYCN             | ChIP        | 1 ug/million cells        | Santa Cruz Biotechnology  | sc_53993       |
| NKX2.5           | IF          | 1:50                      | R&D Systems               | MAB2444        |
| OCT3/4           | IF          | 1:100                     | Santa Cruz Biotechnology  | sc_9081        |
| OCT3/4           | FLOW        | 1:2000                    | Santa Cruz Biotechnology  | sc-5279        |
| PAX6             | IF          | 1:100                     | BioLegend                 | 901301         |
| PKLR             | WB          | 1:1000                    | Cell Signaling Technology | 7067S          |
| PKM1             | WB          | 1:1000                    | Cell Signaling Technology | 4053S          |
| PKM2             | WB          | 1:1000                    | Santa Cruz Biotechnology  | sc-133224      |
| SOX1             | IF          | 1:200                     | Abcam                     | ab87775        |
| SOX17            | IF          | 1:40                      | R&D systems               | AF1924         |
| SOX2             | FLOW/IF     | 1:2000/1:200              | Santa Cruz Biotechnology  | sc_17320       |

| Secondary Antibody                     | Application | Dilution or Concentration | Vendor        | Product Number |
|----------------------------------------|-------------|---------------------------|---------------|----------------|
| Alexa Fluor 488 donkey anti-mouse IgG  | FLOW/IF     | 1:400 both                | Thermo Fisher | A21202         |
| Alexa Fluor 488 donkey anti-rabbit IgG | FLOW/IF     | 1:400 both                | Thermo Fisher | A21206         |
| Alexa Fluor 555 donkey anti-goat IgG   | IF          | 1:400                     | Thermo Fisher | A21432         |
| Alexa Fluor 555 donkey anti-mouse IgG  | IF          | 1:400                     | Thermo Fisher | A31570         |
| Alexa Fluor 555 donkey anti-rabbit IgG | IF          | 1:400                     | Thermo Fisher | A31572         |
| Alexa Fluor 647 donkey anti-goat IgG   | FLOW/IF     | 1:350 both                | Thermo Fisher | A21447         |
| Goat Anti-Rabbit Immunoglobulins/HRP   | WB          | 1:2000                    | Dako          | P0448          |
| Rabbit Anti-Goat Immunoglobulins/HRP   | WB          | 1:2000                    | Dako          | P0449          |
| Rabbit Anti-Mouse Immunoglobulins/HRP  | WB          | 1:2000                    | Dako          | P0161          |

**Table S2. Related to Methods.** Table of primary and secondary antibodies used for immunoblots (WB), immunofluorescence (IF), quantitative ChIP (ChIP), or flow cytometry (FLOW), with dilutions or concentrations listed.

| Gene    | Product Number | Gene     | Product Number |
|---------|----------------|----------|----------------|
| EOMES   | Hs00172872_m1  | NKX2.5   | Hs00231763_m1  |
| FOXA2   | Hs00232764_m1  | OTX2     | Hs00222238_m1  |
| FOXF1   | Hs00230962_m1  | PAX3     | Hs00240950_m1  |
| G6PC    | Hs00609178_m1  | PAX6     | Hs00240871_m1  |
| G6PD    | Hs00166169_m1  | PDK1     | Hs00176853_m1  |
| GATA4   | Hs00171403_m1  | PDK2     | Hs00176865_m1  |
| GATA6   | Hs00232018_m1  | PDK3     | Hs00178440_m1  |
| GCK     | Hs01564555_m1  | PDK4     | Hs01037712_m1  |
| GLCM    | Hs00978072_m1  | PFKFB1   | Hs00159997_m1  |
| GSC     | Hs00906630_g1  | PFKL     | Hs00160027_m1  |
| HAND1   | Hs02330376_s1  | PFKM     | Hs00175997_m1  |
| HK1     | Hs00175976_m1  | PKLR     | Hs00176075_m1  |
| HK2     | Hs00606086_m1  | PKM      | Hs00987255_m1  |
| HK3     | Hs01092850_m1  | PKM2     | Hs00762869_s1  |
| ISL1    | Hs00158126_m1  | POU5F1   | Hs01895061_u1  |
| LDHA    | Hs00855332_g1  | RNA 18S5 | Hs03928985_g1  |
| LDHB    | Hs00600794_mH  | SLC16A1  | Hs00161826_m1  |
| LDHC    | Hs00255650_m1  | SOX1     | Hs01057642_s1  |
| LDHD    | Hs00544860_m1  | SOX17    | Hs00751752_s1  |
| MIX1    | Hs00430824_g1  | SOX2     | Hs01053049_m1  |
| MYC     | Hs00153408_m1  | T        | Hs00610080_m1  |
| MYCN    | Hs00232074_m1  | TALDO1   | Hs00997203_m1  |
| NANOG   | Hs04399610_g1  | TBX20    | Hs00396596_m1  |
| NES     | Hs00707120_s1  | TKT      | Hs01115545_m1  |
| NEUROD1 | Hs00159598_m1  | TUBB3    | Hs00801390_s1  |
| NEUROG3 | Hs00360700_g1  | UGP2     | Hs00198879_m1  |

**Table S3. Related to Methods.** Table of Taqman primers utilized for qRT-PCR.



| <b>Primer</b>    | <b>Sequence 5'-3'</b> |
|------------------|-----------------------|
| HK1 Left         | GGAGGAGGAGGAGGAGGAG   |
| HK1 Right        | GATCATGCTGGCGGTCGG    |
| PKLR Down1 Left  | GAGTCGCGCAATGTTTCATCC |
| PKLR Down1 Right | GGTTCTAGGGCCAGCATCTC  |
| PKLR Down2 Left  | GGAACCTGCAAAGCTCTCCA  |
| PKLR Down2 Right | CACCTTCCCCTGAAACCCTC  |
| LDHA Left        | CTTAGACTCCCAGCGCACG   |
| LDHA Right       | CACGTGTGAGTCGGGCTG    |
| PKM Left         | CGCTGGGGACTTCTGAAGAG  |
| PKM Right        | CGTCTGGGATGCAGTGGAG   |
| TKT Left         | GCTGGTCAGGCTTGTGGTAG  |
| TKT Right        | TATCTCTGTGTGTCCGCGTG  |
| UGP2 Left        | GGGGCGAGAATATGTACGGG  |
| UGP2 Right       | GCAGCGGACACTAAGGGG    |
| TALDO1 Left      | CCCCTCGGTCTTGCTATGTC  |
| TALDO1 Right     | GTCCTCACCGTGGAAGTCG   |
| GK Left          | GCTGGATGGCTCTGCTGT    |
| GK Right         | GCAGAGGGCGATGAGACG    |
| GPI Left         | AAGCACCACTCCCGATGTG   |
| GPI Right        | TGTGGAGACTGAACCTTGCA  |
| PSAT1 Left       | CCTCCTTGGCTGACTCACC   |
| PSAT1 Right      | CTCGCGGGGACTTACTGAG   |
| SLC2A1 Left      | GTAAGGCGGGCAGGAGTC    |
| SLC2A1 Right     | AGCAGCAAGGTGAGTCGC    |

**Table S4. Related to Methods.** Table of primers utilized for quantitative ChIP assays.

| Compound                                         | Vendor    | Product Number | Compound                                                        | Vendor    | Product Number |
|--------------------------------------------------|-----------|----------------|-----------------------------------------------------------------|-----------|----------------|
| Acetyl-CoA lithium salt                          | Sigma     | A2181          | Glycine                                                         | Sigma     | G8898          |
| Adenosine 5'-triphosphate disodium salt hydrate  | Sigma     | A7699          | Glycogen from rabbit liver                                      | Sigma     | G8876          |
| Alanine                                          | Sigma     | A7627          | Guanosine 5'-triphosphate sodium salt hydrate                   | Sigma     | G8877          |
| Aracardic acid                                   | Sigma     | A7236          | Lactate                                                         | Sigma     | L6661          |
| Arginine                                         | Sigma     | A5006          | Malate                                                          | Sigma     | O2288          |
| Asparagine                                       | Sigma     | A0884          | Nicotinamide adenine dinucleotide reduced disodium salt hydrate | Sigma     | N8129          |
| Aspartic Acid                                    | Sigma     | A7219          | Phosphatidylcholine                                             | Sigma     | P3556          |
| Cholesterol                                      | Sigma     | C8667          | Phosphoenolpyruvate monopotassium salt                          | appliChem | a2271          |
| Cysteine                                         | Sigma     | C7755          | Proline                                                         | Sigma     | P0380          |
| Cytidine 5'-triphosphate disodium salt           | Sigma     | C1506          | Pyroglutamic acid                                               | Sigma     | 83160          |
| Fructose                                         | Sigma     | F3510          | Pyruvate                                                        | Sigma     | 107360         |
| Fructose 1,6-bisphosphate trisodium salt hydrate | Sigma     | F6803          | Serine                                                          | Sigma     | S4500          |
| Fumarate                                         | Sigma     | F8509          | Sodium Acetate                                                  | Sigma     | S5635          |
| Galactose                                        | Sigma     | G5388          | Sodium Citrate                                                  | J.T Baker | 3646-01        |
| Glucose                                          | Sigma     | G5767          | Sodium palmitate                                                | Sigma     | P9767          |
| Glucose 1-P                                      | Sigma     | G7018          | Succinate                                                       | Sigma     | S9512          |
| Glucose-6-P sodium salt                          | Sigma     | G7879          | Thymidine 5'-triphosphate sodium salt                           | Sigma     | T0251          |
| Glutamate                                        | Sigma     | G8415          | Triacylglycerol                                                 | Sigma     | T5888          |
| Glutamine                                        | Sigma     | G8540          | Uridine 5'-diphosphate disodium salt hydrate                    | Sigma     | 94330          |
| Glutathione                                      | Sigma     | G4251          | Uridine 5'-diphospho-N-acetylglucosamine sodium salt            | Sigma     | U4375          |
| Glycerol                                         | J.T Baker | 2136-01        | Uridine 5'-diphosphogalactose disodium salt                     | Sigma     | 94333          |
| Glycerol 2-phosphate disodium salt hydrate       | Sigma     | G9891          | Uridine 5'-diphosphoglucose disodium salt                       | Sigma     | 94335          |

**Table S5. Related to Methods.** Table of compounds used for NMR standards in these studies.
